# Supplementary material
Source: Springer Nature journal article supplement (https://mijn.bsl.nl/resource/supplementary/13047_2008_94_MOESM2_ESM.pdf/7109654)

0%

35%

100%

HALLUX

LAT DIGITS

25%

MED  
F/FOOT

LAT  
FOREFOOT

40%

MIDFOOT

70%

HEEL

100%

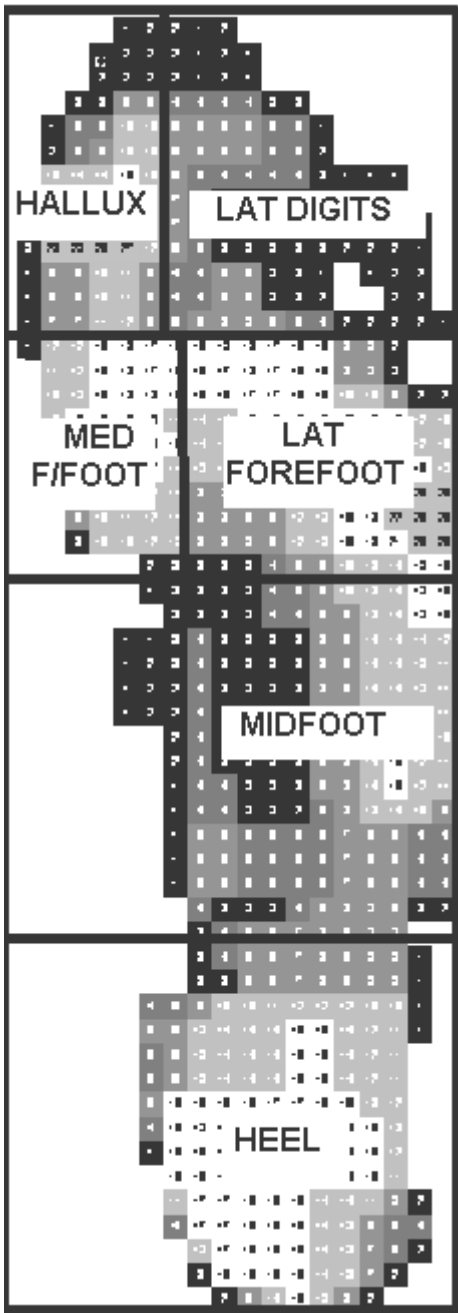

Supplement: MOESM2 [file 7109654]
